# Supplementary material
Source: PubMed Central journal article supplement (PMC3876399)
Supplement: hesr0048-1996-SD2.pdf [file hesr0048-1996-SD2.pdf]

**4.A. Author matrix.** Please complete the authorship matrix affirming which roles each author has fulfilled. To be listed as an author, persons should have made contributions in both of the shaded areas; all others should be acknowledged as contributors. In the box in 4.B., we invite you to name other contributors. In addition, you may use the box in 4.B. if you wish to name other kinds of contributions by authors.

Section 4 A. and B. will be made available in the electronic version of accepted manuscripts.

\*You may wish to copy the author's names from the box on page 2.

| Manuscript Number:<br>HSR-12-0580.R1 | Each author must check at least one blue box showing important contributions to: |                                                  |                                     | & check contributions in at least one orange box: |                                                      |
|--------------------------------------|----------------------------------------------------------------------------------|--------------------------------------------------|-------------------------------------|---------------------------------------------------|------------------------------------------------------|
|                                      | Conception and design                                                            | Acquisition of data (arranging for or obtaining) | Analysis and interpretation of data | Drafting the manuscript                           | Critical revision for important intellectual content |
| Name of Each Author*                 |                                                                                  |                                                  |                                     |                                                   |                                                      |
| Austin B Frakt                       | <input checked="" type="checkbox"/>                                              | <input checked="" type="checkbox"/>              | <input checked="" type="checkbox"/> | <input checked="" type="checkbox"/>               | <input checked="" type="checkbox"/>                  |
| Steven D Pizer                       | <input checked="" type="checkbox"/>                                              | <input checked="" type="checkbox"/>              | <input checked="" type="checkbox"/> | <input checked="" type="checkbox"/>               | <input checked="" type="checkbox"/>                  |
| Roger Feldman                        | <input checked="" type="checkbox"/>                                              | <input checked="" type="checkbox"/>              | <input checked="" type="checkbox"/> | <input checked="" type="checkbox"/>               | <input checked="" type="checkbox"/>                  |
|                                      | <input type="checkbox"/>                                                         | <input type="checkbox"/>                         | <input type="checkbox"/>            | <input type="checkbox"/>                          | <input type="checkbox"/>                             |
|                                      | <input type="checkbox"/>                                                         | <input type="checkbox"/>                         | <input type="checkbox"/>            | <input type="checkbox"/>                          | <input type="checkbox"/>                             |
|                                      | <input type="checkbox"/>                                                         | <input type="checkbox"/>                         | <input type="checkbox"/>            | <input type="checkbox"/>                          | <input type="checkbox"/>                             |
|                                      | <input type="checkbox"/>                                                         | <input type="checkbox"/>                         | <input type="checkbox"/>            | <input type="checkbox"/>                          | <input type="checkbox"/>                             |
|                                      | <input type="checkbox"/>                                                         | <input type="checkbox"/>                         | <input type="checkbox"/>            | <input type="checkbox"/>                          | <input type="checkbox"/>                             |
|                                      | <input type="checkbox"/>                                                         | <input type="checkbox"/>                         | <input type="checkbox"/>            | <input type="checkbox"/>                          | <input type="checkbox"/>                             |
|                                      | <input type="checkbox"/>                                                         | <input type="checkbox"/>                         | <input type="checkbox"/>            | <input type="checkbox"/>                          | <input type="checkbox"/>                             |
|                                      | <input type="checkbox"/>                                                         | <input type="checkbox"/>                         | <input type="checkbox"/>            | <input type="checkbox"/>                          | <input type="checkbox"/>                             |
|                                      | <input type="checkbox"/>                                                         | <input type="checkbox"/>                         | <input type="checkbox"/>            | <input type="checkbox"/>                          | <input type="checkbox"/>                             |
|                                      | <input type="checkbox"/>                                                         | <input type="checkbox"/>                         | <input type="checkbox"/>            | <input type="checkbox"/>                          | <input type="checkbox"/>                             |
|                                      | <input type="checkbox"/>                                                         | <input type="checkbox"/>                         | <input type="checkbox"/>            | <input type="checkbox"/>                          | <input type="checkbox"/>                             |



**Section 4.B. Other Contributions**

Some research projects involve very extensive teams with many people who do not meet the criteria for authorship but who have contributed importantly to the work. The box below is designed to acknowledge other types of contributions. As appropriate, use this box to name other people who have made important contributions to the work reported in this manuscript. Please also name people who have played a significant role in preparing the manuscript but who are not listed as authors. NOTE: If you wish to acknowledge any of these contributors in print, please include their names and roles in the joint acknowledgment section below.

|                                                  |
|--------------------------------------------------|
| Please name contributors to be acknowledged for: |
| Statistical analysis                             |
|                                                  |
| Data collection (under supervision)              |
|                                                  |
| Interviewing (under supervision)                 |
|                                                  |
| Programming and data management                  |
|                                                  |
| Editing for presentation or style                |
|                                                  |
| Obtaining funding                                |
|                                                  |
| Administrative, technical, or material support   |
|                                                  |
| Supervision of research staff                    |
|                                                  |
| Other (specify)                                  |
|                                                  |



**INSTRUCTIONS: THE CORRESPONDING AUTHOR MUST FILL OUT SECTION 5.**

**5. Joint Acknowledgment/Disclosure Statement.** Please enter a 1-3 sentence statement that acknowledges all forms of financial and material support for the project, the roles of key individuals who should be recognized; (this may or may not extend to everyone listed as contributors). Please also include summary statements about what you feel are the conflicts of interests and disclosures without which some readers may feel that important relevant information is being withheld. The editors will determine whether these disclosures are sufficient or excessive and may return a revised version. All authors will need to approve the final version. As appropriate, please add at the end of your statement: 'Disclosures: None' or 'No Other Disclosures'.

Section 5 will be made available in both the electronic and print version of accepted manuscripts.

**Joint Acknowledgement/Disclosure Statement:**

This research was supported by a contract with the Attorney General of the Commonwealth of Pennsylvania. The views expressed in this article are those of the authors and do not necessarily reflect the positions of the Department of Veterans Affairs, Boston University, the University of Minnesota, the University of Pennsylvania, or the Commonwealth of Pennsylvania.

No other disclosures.

**The corresponding author** should obtain permission to name all individuals named in an Acknowledgment or the Contributorship Section because readers may infer their endorsement of data and conclusions.

**The corresponding author must check the box below to affirm his/her certification that:**

- all persons who have made substantial contributions to the work reported in this manuscript (e.g., data collection, analysis, or writing or editing assistance) but who do not fulfill the authorship criteria are named with their specific contributions in the Contributorship Box associated with the manuscript.
- all persons named in the Contributorship box have provided me with permission to be named.
- no other persons have made substantial contributions to this manuscript.
- all authors have approved the Joint Acknowledgement/Disclosure Statement intended for publication and the author matrix.

I, the corresponding author, certify that the above statements are true.

(Adapted, with permission, from the Journal of the American Medical Association, 2006)
